# Supplementary material
Source: PubMed Central journal article supplement (PMC2430338)
Supplement: 0707364105_Supplemental_PDF.pdf [file 0707364105_Supplemental_PDF.pdf]

# Supporting Information

Vaziri and Mahadevan 10.1073/pnas.0707364105

## SI Text

**The Response of a Spherical Cap to Point Indentation.** See Movie S1, Fig. 1 in the main text, and Fig. S1). Movie S1 shows distribution of the elastic energy density ( $A$ ), deformed configuration ( $B$ ), and force-indentation response of the shell ( $C$ ) as the indentation increases. The elastic shell has the following geometrical parameters:  $t/R = 0.005$ ,  $\alpha = 120^\circ$ ,  $R = 1$  m (see Fig. 1B for definitions)

**Effect of Shell Thickness on the Response of a Spherical Cap to Point Indentation.** To understand how the thickness of the shell affects the nonlinear response of the spherical cap, we resorted to a series of numerical simulations for the indentation problem.
